# Supplementary material
Source: Springer Nature journal article supplement (https://www.springermedizin.de/resource/supplementary/12865_2008_257_MOESM3_ESM.pdf/9427614)

A.

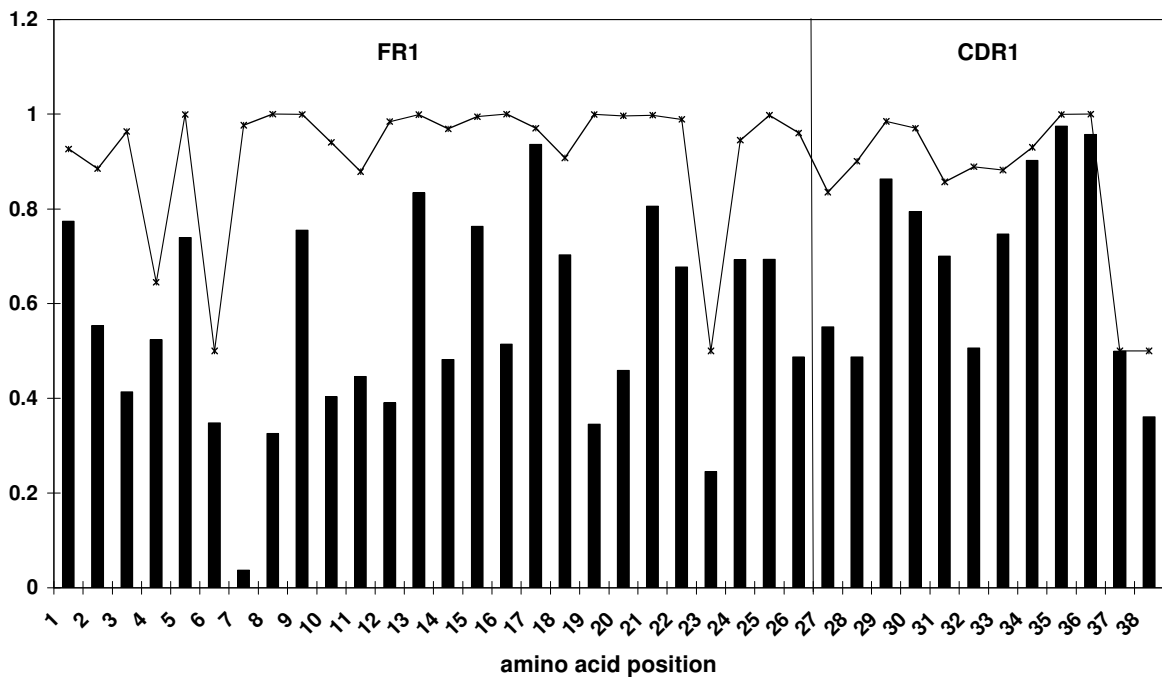

B.

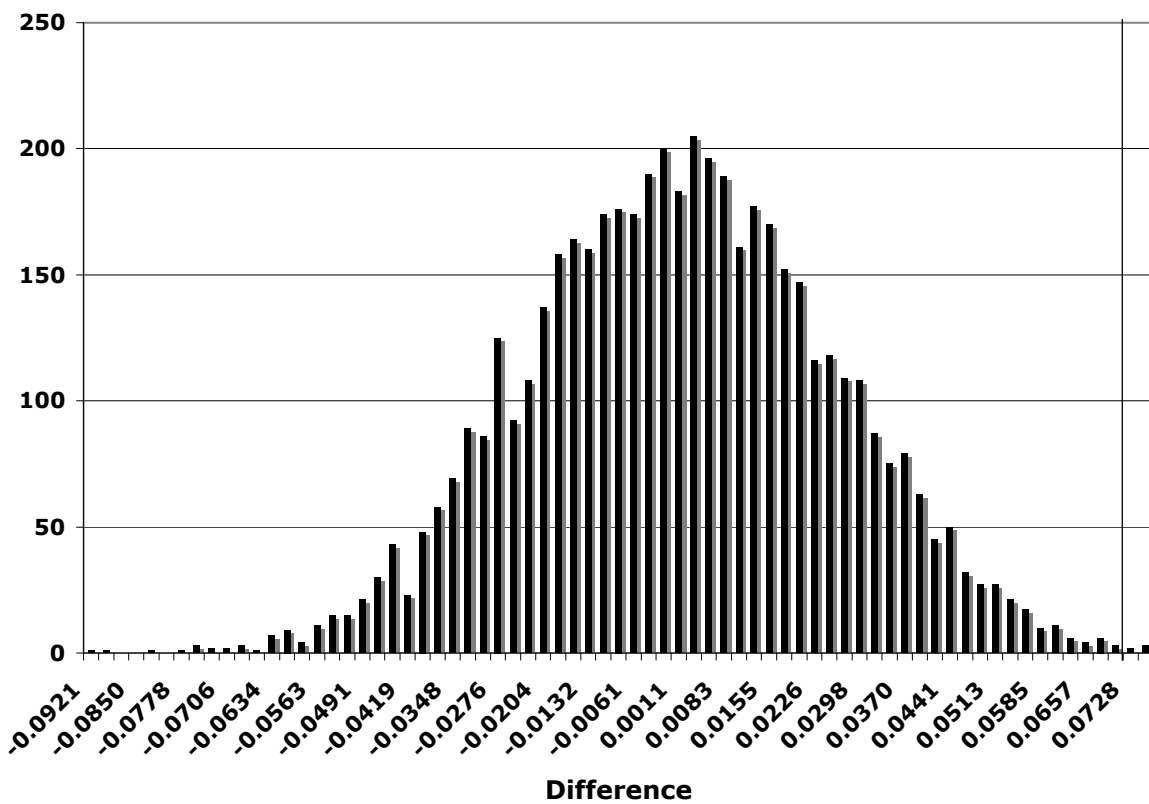

Supplement: MOESM3 [file 9427614]
